# Supplementary material
Source: MDPI journal article supplement (https://www.mdpi.com/2504-3129/3/1/9)
Supplement: s1 [file s1]

Table S1. Basic soil physical/chemical properties for landscape patches used in this study.

| <b>Landscape patch</b> | <b>pH (water)</b> |                |                | <b>Total C (mg/g)</b> |                 |                 | <b>Total N (mg/g)</b> |                 |                 | <b>C:N</b>     |                 |                 |
|------------------------|-------------------|----------------|----------------|-----------------------|-----------------|-----------------|-----------------------|-----------------|-----------------|----------------|-----------------|-----------------|
|                        | <i>0-15cm</i>     | <i>15-30cm</i> | <i>30-52cm</i> | <i>0-15 cm</i>        | <i>15-30 cm</i> | <i>30-52 cm</i> | <i>0-15 cm</i>        | <i>15-30 cm</i> | <i>30-52 cm</i> | <i>0-15 cm</i> | <i>15-30 cm</i> | <i>30-52 cm</i> |
| <b>TfGr</b>            | 7.72              | 7.54           | 7.38           | 4.99                  | 3.74            | 3.34            | 0.35                  | 0.31            | 0.32            | 14.3           | 12.1            | 10.4            |
| <b>PP</b>              | 7.83              | 8.01           | 7.65           | 12.92                 | 7.45            | 5.01            | 0.92                  | 0.51            | 0.37            | 14.0           | 14.6            | 13.5            |
| <b>OMx</b>             | 7.77              | 7.36           | 7.49           | 15.65                 | 4.16            | 12.61           | 0.65                  | 0.31            | 0.65            | 24.1           | 13.4            | 19.4            |
| <b>OGa</b>             | 7.49              | 7.82           | 8.08           | 9.44                  | 9.57            | 8.81            | 0.53                  | 0.51            | 0.70            | 17.8           | 18.8            | 12.6            |
| <b>MulP</b>            | 6.09              | 7.81           | 7.21           | 21.11                 | 9.88            | 7.08            | 0.98                  | 0.43            | 0.33            | 21.5           | 23.0            | 21.5            |
| <b>MulC</b>            | 7.62              | 7.27           | 7.22           | 8.89                  | 5.66            | 5.81            | 0.48                  | 0.39            | 0.40            | 18.5           | 14.5            | 14.5            |
| <b>Agr</b>             | 6.25              | 6.29           | 6.20           | 7.47                  | 11.37           | 8.86            | 0.63                  | 0.80            | 0.57            | 11.9           | 11.1            | 15.5            |

Table S2. Raw data showing nitrification, mineralization, and exchangeable inorganic N for all landscape patches and soil depths. Depth 1 is 0-15cm, depth 2 is 15-30 cm, and depth 3 is 30-52 cm.

| Landscape Patch | Nitrification, mg N/kg/d | Net N Mineralization mg N/kg/d | Exchangeable NO3, mg/Kg | Exchangeable NH4, mg/Kg | Soil depth |
|-----------------|--------------------------|--------------------------------|-------------------------|-------------------------|------------|
| TfGr            | 0.49                     | 0.48                           | 0.43                    | 0.81                    | 1          |
| TfGr            | 0.55                     | 0.56                           | 0.43                    | 0.66                    | 1          |
| TfGr            | 0.48                     | 0.48                           | 0.47                    | 0.62                    | 1          |
| PP              | 1.84                     | 2.24                           | 0.65                    | 1.51                    | 1          |
| PP              | 1.83                     | 2.22                           | 0.69                    | 1.39                    | 1          |
| PP              | 1.63                     | 2.02                           | 0.69                    | 1.49                    | 1          |
| OMx             | 0.10                     | 0.02                           | 0.96                    | 1.55                    | 1          |
| OMx             | 0.10                     | 0.06                           | 0.44                    | 1.57                    | 1          |
| OMx             | 0.04                     | 0.00                           | 0.46                    | 1.61                    | 1          |
| OGa             | 0.56                     | 0.50                           | 0.60                    | 1.28                    | 1          |
| OGa             | 0.57                     | 0.51                           | 0.62                    | 1.30                    | 1          |
| OGa             | 0.56                     | 0.49                           | 0.64                    | 1.37                    | 1          |
| MulP            | 0.01                     | 0.00                           | 2.56                    | 1.97                    | 1          |
| MulP            | 0.24                     | 0.16                           | 1.89                    | 1.71                    | 1          |
| MulP            | 0.10                     | 0.00                           | 2.57                    | 3.24                    | 1          |
| MulC            | 0.33                     | 0.36                           | 1.38                    | 0.83                    | 1          |
| MulC            | 0.59                     | 0.40                           | 1.38                    | 0.69                    | 1          |
| MulC            | 0.27                     | 0.30                           | 1.47                    | 0.78                    | 1          |
| Agr             | 0.99                     | 1.30                           | 1.66                    | 2.04                    | 1          |
| Agr             | 0.89                     | 1.14                           | 1.76                    | 2.00                    | 1          |
| Agr             | 1.10                     | 1.57                           | 1.71                    | 2.00                    | 1          |
| TfGr            | 0.00                     | 0.00                           | 6.59                    | 0.50                    | 2          |
| TfGr            | 0.00                     | 0.00                           | 6.72                    | 0.40                    | 2          |
| TfGr            | 0.00                     | 0.00                           | 6.83                    | 0.32                    | 2          |
| PP              | 0.49                     | 0.82                           | 0.49                    | 1.30                    | 2          |
| PP              | 0.49                     | 0.74                           | 0.46                    | 1.35                    | 2          |

|      |      |      |      |      |   |
|------|------|------|------|------|---|
| PP   | 0.46 | 0.79 | 0.46 | 1.48 | 2 |
| OMx  | 0.02 | 0.02 | 0.78 | 0.63 | 2 |
| OMx  | 0.00 | 0.00 | 0.80 | 0.48 | 2 |
| OMx  | 0.00 | 0.00 | 0.76 | 0.49 | 2 |
| OGa  | 0.00 | 0.00 | 3.78 | 0.67 | 2 |
| OGa  | 0.00 | 0.00 | 3.64 | 0.58 | 2 |
| OGa  | 0.00 | 0.00 | 3.68 | 0.59 | 2 |
| MulP | 0.25 | 0.19 | 2.16 | 1.21 | 2 |
| MulP | 0.08 | 0.03 | 2.17 | 1.17 | 2 |
| MulP | 0.14 | 0.00 | 2.20 | 2.48 | 2 |
| MulC | 0.12 | 0.49 | 1.20 | 0.49 | 2 |
| MulC | 0.05 | 0.53 | 1.24 | 0.49 | 2 |
| MulC | 0.03 | 0.45 | 1.38 | 0.50 | 2 |
| Agr  | 0.69 | 1.22 | 1.37 | 0.54 | 2 |
| Agr  | 0.71 | 1.03 | 1.32 | 0.50 | 2 |
| Agr  | 0.73 | 1.35 | 1.32 | 0.53 | 2 |
| TfGr | 0.00 | 0.00 | 1.86 | 0.31 | 3 |
| TfGr | 0.00 | 0.00 | 1.89 | 0.34 | 3 |
| TfGr | 0.00 | 0.00 | 1.85 | 0.30 | 3 |
| PP   | 0.02 | 0.50 | 0.65 | 0.63 | 3 |
| PP   | 0.02 | 0.51 | 0.62 | 0.59 | 3 |
| PP   | 0.02 | 0.58 | 0.63 | 0.52 | 3 |
| OMx  | 0.00 | 0.00 | 8.90 | 0.38 | 3 |
| OMx  | 0.00 | 0.00 | 8.15 | 0.41 | 3 |
| OMx  | 0.00 | 0.00 | 8.33 | 0.52 | 3 |
| OGa  | 0.18 | 0.18 | 0.17 | 0.62 | 3 |
| OGa  | 0.24 | 0.25 | 0.19 | 0.75 | 3 |
| OGa  | 0.19 | 0.20 | 0.19 | 0.66 | 3 |
| MulP | 0.00 | 0.00 | 4.15 | 1.22 | 3 |
| MulP | 0.00 | 0.00 | 2.54 | 0.92 | 3 |

|      |      |      |      |      |   |
|------|------|------|------|------|---|
| MuIP | 0.00 | 0.28 | 1.77 | 0.74 | 3 |
| MuIC | 0.09 | 0.59 | 0.19 | 0.56 | 3 |
| MuIC | 0.11 | 0.49 | 0.20 | 0.49 | 3 |
| MuIC | 0.17 | 0.63 | 0.19 | 0.45 | 3 |
| Agr  | 0.23 | 0.55 | 0.41 | 1.31 | 3 |
| Agr  | 0.26 | 0.61 | 0.32 | 1.33 | 3 |
| Agr  | 0.25 | 0.68 | 0.34 | 1.37 | 3 |
